1                                   **Visually evoked neuronal ensembles reactivate during sleep**

2

3 Justin Lines<sup>1</sup> and Rafael Yuste<sup>1</sup>

4

5 1. Neurotechnology Center, Dept. of Biological Sciences, Columbia University, New York, NY  
6 10027

7

8 Correspondence should be addressed to:

9

10

11 Dr. Justin Lines

12 Neurotechnology Center

13 Dept. of Biological Sciences

14 Columbia University

15 906 NWC Building

16 550 West 120<sup>th</sup> Street, Box 4822, New York, NY 10032

17 Phone: (212) 854 5023

18 E-mail: [jl5675@columbia.edu](mailto:jl5675@columbia.edu)

19

20

21

22

1 **Abstract**

2 Neuronal ensembles, defined as groups of coactive neurons, dominate cortical activity and are  
3 causally related to perceptual states and behavior. Interestingly, ensembles occur spontaneously  
4 in the absence of sensory stimulation. To better understand the function of ensembles in  
5 spontaneous activity, we explored if ensembles also occur during different brain states, including  
6 sleep, using two-photon calcium imaging from mouse primary visual cortex. We find that  
7 ensembles are present during all wake and sleep states, with different characteristics depending  
8 on the exact sleep stage. Moreover, visually evoked ensembles are reactivated during  
9 subsequent slow wave sleep cycles. Our results are consistent with the hypothesis that repeated  
10 sensory stimulation can reconfigure cortical circuits and imprint neuronal ensembles that are  
11 reactivated during sleep for potential processing or memory consolidation.

12

13 **One-Sentence Summary:** Cortical neuronal ensembles are present across wake and sleep  
14 states, and visually evoked ensembles are reactivated in subsequent slow-wave sleep.

15

16 **Keywords:**

17 Neuronal ensemble, sleep, brain state, memory processing, replay, reactivation, slow-wave  
18 sleep, REM sleep, NREM sleep

19

## 1 Introduction

2 Perceptual memory is believed to be encoded in organized ensembles formed by  
3 synchronous neuronal firing by small groups of neurons within the cortex<sup>1-3</sup>. Neuronal ensembles  
4 in the cortex can be activated by the exposure to a sensory stimulus but can also occur  
5 spontaneously<sup>4,5</sup>. The function of the spontaneous activation of cortical ensembles is unknown.  
6 Previous studies have shown that spontaneous ensembles are statistically identical to sensory  
7 evoked ensembles<sup>4,5</sup>. This resemblance suggested the hypothesis that ensembles are  
8 endogenous building blocks of cortical function that are recruited by sensory stimuli, from an  
9 internal lexicon of patterns. However, another possibility is that sensory stimulus creates and  
10 “burns in” ensembles into cortical activity, and that these ensembles are later reactivated  
11 spontaneously during rest, as echoes of past sensory experience<sup>6</sup>. To discern these possibilities,  
12 one potential clue comes from studies of sleep.

13  
14 During sleep, the brain is placed in a quiescent state, disconnected from sensory input.  
15 Cortical activity during wake and rapid eye movement sleep (REM) displays high frequency brain  
16 waves<sup>7</sup>. In contrast, cortical activity during slow-wave sleep (SWS) is reduced to low frequency  
17 oscillations<sup>8</sup>, where the newly formed ensembles of neuronal activity are thought to  
18 spontaneously reactivate<sup>9,10</sup>. Additionally, reports have found differential calcium activity between  
19 wake, REM sleep and SWS<sup>11-13</sup>. In addition, REM and SWS are believed to play differential roles  
20 in synaptic scaling with downscaling and upscaling occurring respectively<sup>14,15</sup>. Measures of  
21 functional network architecture have been done at the mesoscopic scale or motor cortices across  
22 wake and sleep<sup>16,17</sup>, however the functional architecture underlying neuronal network activity  
23 across wake and sleep in sensory cortices have not been fully examined.

24  
25 Previous reports have shown neuronal sequential replay during slow-wave sleep in the  
26 hippocampus and primary visual cortex (V1) during an exploration task<sup>9,10</sup>. Consistent with this,  
27 neuronal activity has been shown to replay during wake, slow-wave sleep, and REM sleep<sup>9,10,18,19</sup>.  
28 Reactivation is thought to underlie memory consolidation, where the spontaneous activation of  
29 newly formed neuronal ensembles has been posited to improve the stability of ensemble activity  
30 and improve memory retention<sup>20-22</sup>. Further, the spontaneous reactivation of visually evoked  
31 neuronal ensembles in the cortex across wake and sleep is understudied.

32  
33 The past results on reactivation during sleep suggest that the reactivation of cortical  
34 ensembles could also be linked to the consolidation of memories, or, more generally, to the further  
35 processing of sensory information. To explore this possibility, and further investigate the relation  
36 between visually evoked ensembles and ongoing cortical activity, we studied neuronal ensembles  
37 during wake and sleep. First, we characterize the functional architecture of the primary visual  
38 cortex across wake and sleep. Next, we evaluate neuronal ensembles across wake and sleep  
39 brain stages. Finally, we assess the spontaneous reactivation of visually evoked neuronal  
40 ensembles during the subsequent wake and sleep stages. Our results are consistent with the  
41 hypothesis that sensory activity creates ensembles that are then reactivated spontaneously, in  
42 both wake and sleep, for potential memory consolidation.

## 1 Results

### 2 Conserved neuronal population activity in different wake and sleep states

3 To record neuronal ensembles across wake and sleep states, we measured the activity of  
4 neuronal populations using two-photon calcium imaging in parallel with electrocorticogram  
5 (ECoG) and electromyography (EMG) in head-restrained mice (Figure 1A-C). In addition to  
6 electrophysiological recordings, an infrared camera was used to monitor the mouse to confirm  
7 sleep status (Figure 1B). Mice were handled for a few days leading up to habituation on the head-  
8 restraint system that took 2-3 days of consistent runs. To aid sleep, the room was temperature  
9 controlled to stay above 25° C and a lavender scent was introduced. We implemented an  
10 automatic sleep rating algorithm to determine wake and sleep states of the animal while recording  
11 neuronal calcium activity in layer 2/3 of the primary visual cortex (Please see Materials and  
12 Methods: Figure 1C,D).

13 Following habituation to the experimental setup, mice were observed during different  
14 behaviors such as locomotion, non-locomotive quiet wake, REM sleep, light and deep slow-wave  
15 sleep (SWS). While there was a trend for neuronal frequency and neuronal synchrony to be  
16 reduced in SWS, we observed no significant difference in neuronal activity between these brain  
17 states (ANOVA; neuronal firing rate:  $p = 0.43$ ; neuronal synchrony:  $p = 0.91$ ). This demonstrates  
18 that neuronal activity, on average, is conserved across sleep states.

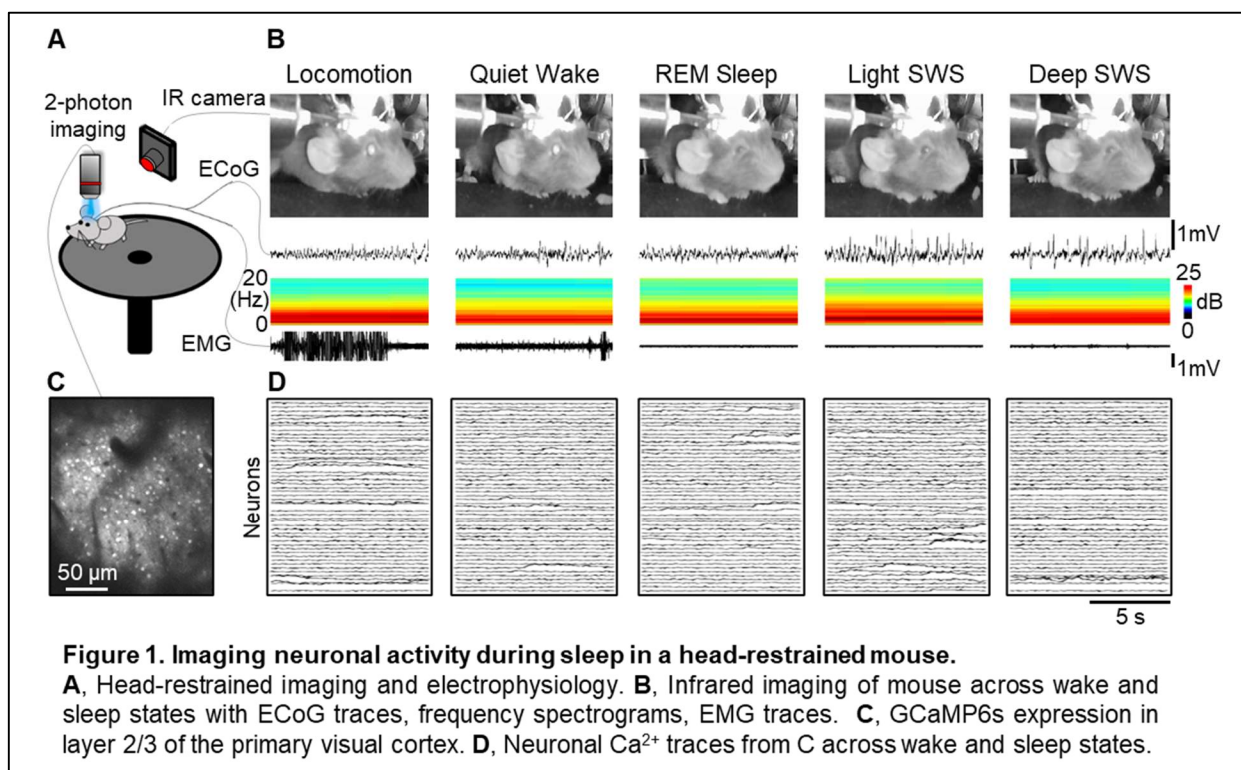

**Figure 1. Imaging neuronal activity during sleep in a head-restrained mouse.**

**A**, Head-restrained imaging and electrophysiology. **B**, Infrared imaging of mouse across wake and sleep states with ECoG traces, frequency spectrograms, EMG traces. **C**, GCaMP6s expression in layer 2/3 of the primary visual cortex. **D**, Neuronal  $\text{Ca}^{2+}$  traces from C across wake and sleep states.

19  
20  
21  
22  
23

## 1 Changes in cortical functional architecture across wake and sleep states

2 We next asked whether  
3 parameters of network functional  
4 architecture were altered across wake  
5 and sleep states. First, we determined  
6 the functional connectivity between  
7 neurons using cosine similarity of their  
8 rasterized traces. We found that the  
9 average functional connectivity was not  
10 significantly different across brain  
11 states (ANOVA:  $p = 0.39$ ; 28  
12 experiments, 7 animals). But, at the  
13 same time, when comparing neuron  
14 pairs with nonzero positive functional  
15 connectivity, network activity during  
16 REM sleep as well as light and deep  
17 SWS had an increased neuronal  
18 functional connectivity, when  
19 compared to activity during wake  
20 states (ANOVA:  $p < 0.001$ ;  $5.3 \pm 0.8\%$  in wake  
21 vs.  $6.6 \pm 1.6\%$  in REM:  $p < 0.001$ ; vs.  
22  $5.8 \pm 1.2\%$  in light SWS:  $p < 0.01$ ; vs.  
23  $6.2 \pm 1.1\%$  in deep SWS:  $p < 0.001$ ; 28  
24 experiments, 7 animals: Figure 2A,B).  
25 These results demonstrate that  
26 neurons either fire more synchronously  
27 during sleep states or not at all and  
28 suggest potential differences in the  
29 underlying network architecture. To  
30 further investigate this, we next  
31 digitalized all positive entries as ones  
32 in the cosine similarity matrices to create  
33 adjacency matrices to determine the  
34 clustering coefficients of individual  
35 neurons within the network. We found  
36 that the average clustering coefficient  
37 was reduced in sleep compared to quiet  
38 wake (ANOVA:  $p < 0.001$ ;  $0.97 \pm$   
39  $0.04$  in wake vs.  $0.83 \pm 0.12$  in REM:  $p < 0.001$ ; vs.  $0.89 \pm 0.1$  in light SWS:  $p < 0.001$ ; vs.  $0.83 \pm$   
40  $0.11$  in deep SWS:  $p < 0.001$ ; 28 experiments, 7 animals: Figure 2C,D). These results indicated  
41 that specific sleep states, although they have an overall similar amount of neuronal activity, have  
42 a distinct functional architecture.

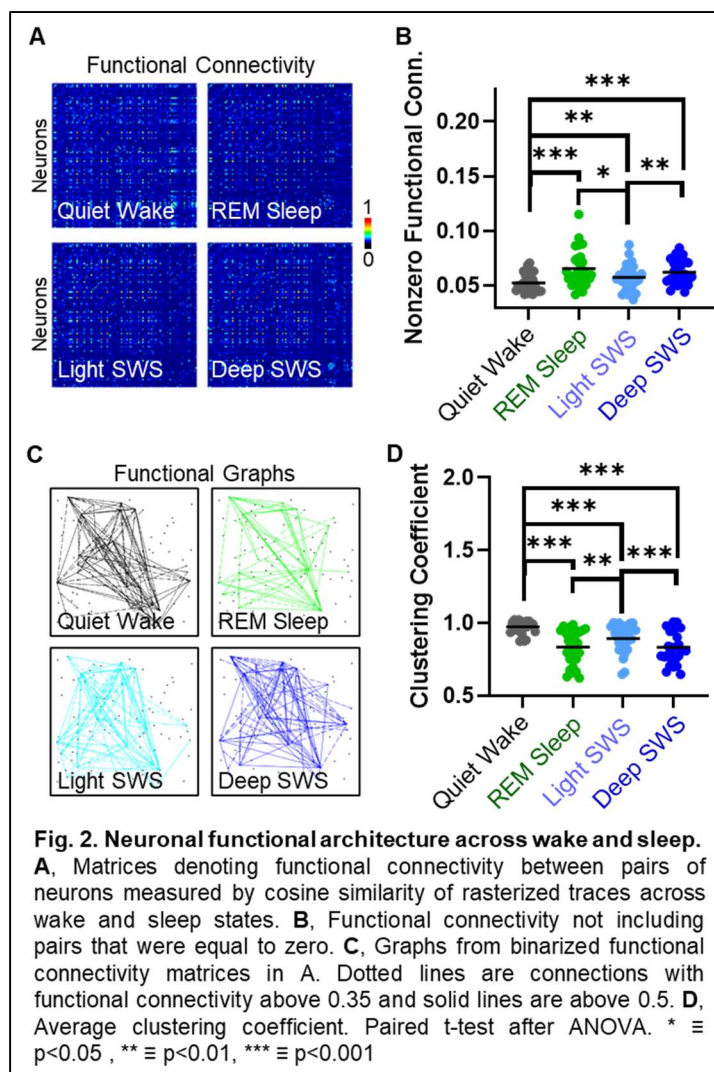

40  
41  
42  
43  
44  
45  
46

## 1 Neuronal ensembles occur during all wake and sleep states

2 Observing changes in the functional architecture of the cortical network suggested that  
 3 encoding of sensory information by the network may be different between wake and sleep states.  
 4 One way that cortical circuits encode sensory information occurs via the synchronous firing of  
 5 neurons within ensembles. To explore this, we investigated the specific organization of neuronal  
 6 ensembles in different wake and sleep states. We extracted neuronal ensembles from the raster  
 7 of activity using Non-Negative Matrix Factorization (NMF)<sup>23,24</sup> (Figure 3A-D). We observed  
 8 neuronal ensembles occurring in spontaneous activity across wake and sleep states (Figure 3E).  
 9 At the same time, although neuronal ensembles were observed across all wake and sleep states,  
 10 the frequency of neuronal ensembles were reduced in REM sleep, as compared to wake, light  
 11 and deep SWS (ANOVA:  $p < 0.0001$ ;  $0.015 \pm 0.009$  Hz in REM sleep vs.  $0.023 \pm 0.008$  Hz in  
 12 wake:  $p < 0.001$ ; vs.  $0.024 \pm 0.009$  Hz in light SWS:  $p < 0.0001$ ; vs.  $0.025 \pm 0.009$  Hz in  
 13 deep SWS:  $p < 0.001$ ; 28 experiments, 7 animals: Figure 3F). Further, there was no  
 14 significant differences between neuronal ensemble frequency during quiet wake and light ( $p =$   
 15  $0.33$ ) or deep ( $p = 0.09$ ) SWS. Next, we observed the percentage of neurons active  
 16 within an ensemble, or neuronal ensemble expression, at every occurrence where over 35% of  
 17 the ensemble neurons were active together, and found that the neuronal ensemble  
 18 expression was decreased during REM sleep compared to wake, light and deep SWS  
 19 (ANOVA:  $p < 0.05$ ;  $47.2 \pm 3.1$  % in REM sleep vs.  $49.3 \pm 3.0$  % in  
 20 wake:  $p < 0.001$ ; vs.  $49.2 \pm 3.6$  % in light SWS:  $p < 0.001$ ; vs.  $49.2 \pm 2.7$  % in deep SWS:  $p < 0.001$ ;  
 21 28 experiments, 7 animals: Figure 3G). Again, we found no significant difference in neuronal  
 22 ensemble expression between quiet wake and light ( $p = 0.83$ ) or deep ( $p = 0.72$ ) SWS. Together,  
 23 these results demonstrate that, while ensembles appear altered during REM sleep, neuronal  
 24 ensemble activity is overall similar to wake in both light and deep SWS.

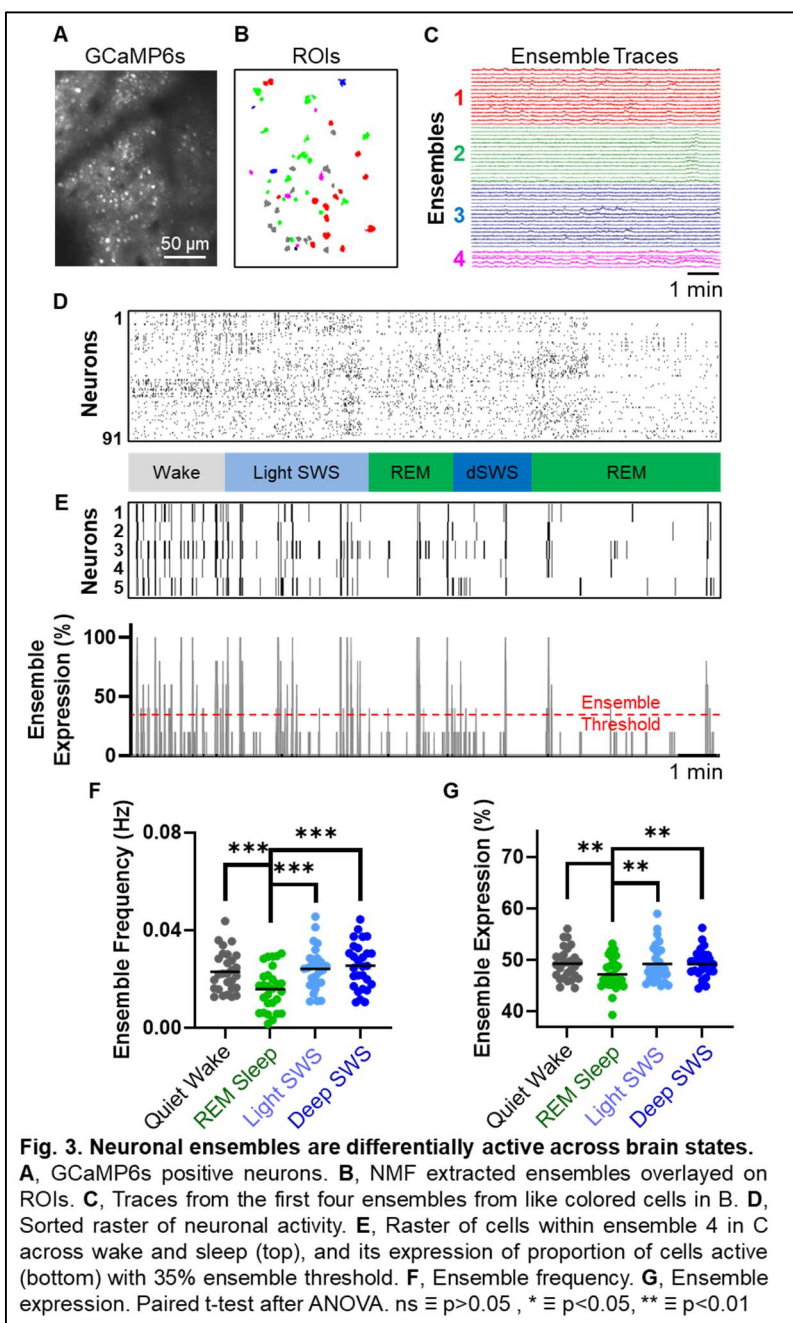

50

## 1 **Similar functional architecture during visual stimulation and spontaneous activity**

2 The past results on spontaneous activity suggest that sleep states may implement distinct  
3 stages for processing of sensory information. To explore this in more detail, we evaluated  
4 neuronal activity in V1 across wake and sleep states before and after the presentation of novel  
5 visual gratings (Figure 4A-C). Drifting visual gratings were presented for 2 s with 3 s interstimulus  
6 interval repeated in a pseudorandom order in the cardinal directions over a ten-minute-long  
7 stimulation block. Rest periods were recorded 30 minutes before and after visual stimulus where  
8 animals could sleep. Similarly, to above, we monitored electrophysiology and neuronal calcium  
9 during visual stimulation (Figure 4A-C). We observed an increase in neuronal firing rate during  
10 light SWS ( $0.33 \pm 0.05$  Hz before stimulation vs.  $0.36 \pm 0.04$  Hz after stimulation;  $p < 0.05$ ; 18  
11 experiments, 7 animals: Figure 4D,E). We did not observe any differences in quiet wake, REM  
12 sleep or deep SWS (Figure S1A). This suggests that visual stimulation caused an increase in  
13 neuronal activity only during subsequent light SWS. We did not find any significant changes to  
14 functional connectivity or average clustering coefficient, suggesting that visual stimulation does  
15 not alter the functional architecture of wake and sleep states in the visual cortex.

16

## 17 **Visually evoked ensembles reactivate during light slow-wave sleep**

18 We then turned our attention to ensembles and investigated if the visual stimulation can  
19 alter the repertoire of ensembles present spontaneously in different wake and sleep states. To  
20 evaluate neuronal ensembles, we defined ensembles using NMF only on frames during the  
21 stimulation block, and then quantified the expression and frequency of these ensembles during  
22 the resting periods before and after visual stimulation (Figure 4F). We observed that neuronal  
23 ensembles following visual stimulation had no significant differences in expression during light  
24 SWS ( $47.1 \pm 4.8$  % before vs.  $47.6 \pm 5.5$  % after;  $p = 0.18$ ; 18 experiments, 7 animals: Figure  
25 4G). However, the frequency of spontaneous neuronal ensembles was increased following visual  
26 stimulation during light SWS ( $0.018 \pm 0.010$  Hz before vs.  $0.021 \pm 0.011$  Hz after;  $p < 0.05$ ; 18  
27 experiments, 7 animals: Figure 4H). At the same time, we did not observe changes in neuronal  
28 ensemble expression or frequency in quiet wake, REM sleep or deep SWS following visual  
29 stimulation (Figure S1B,C). Taken together, these results show that a novel visual stimulation  
30 increases the reactivation of neuronal and ensemble activity in subsequent SWS, and that this  
31 effect is specific to light SWS.

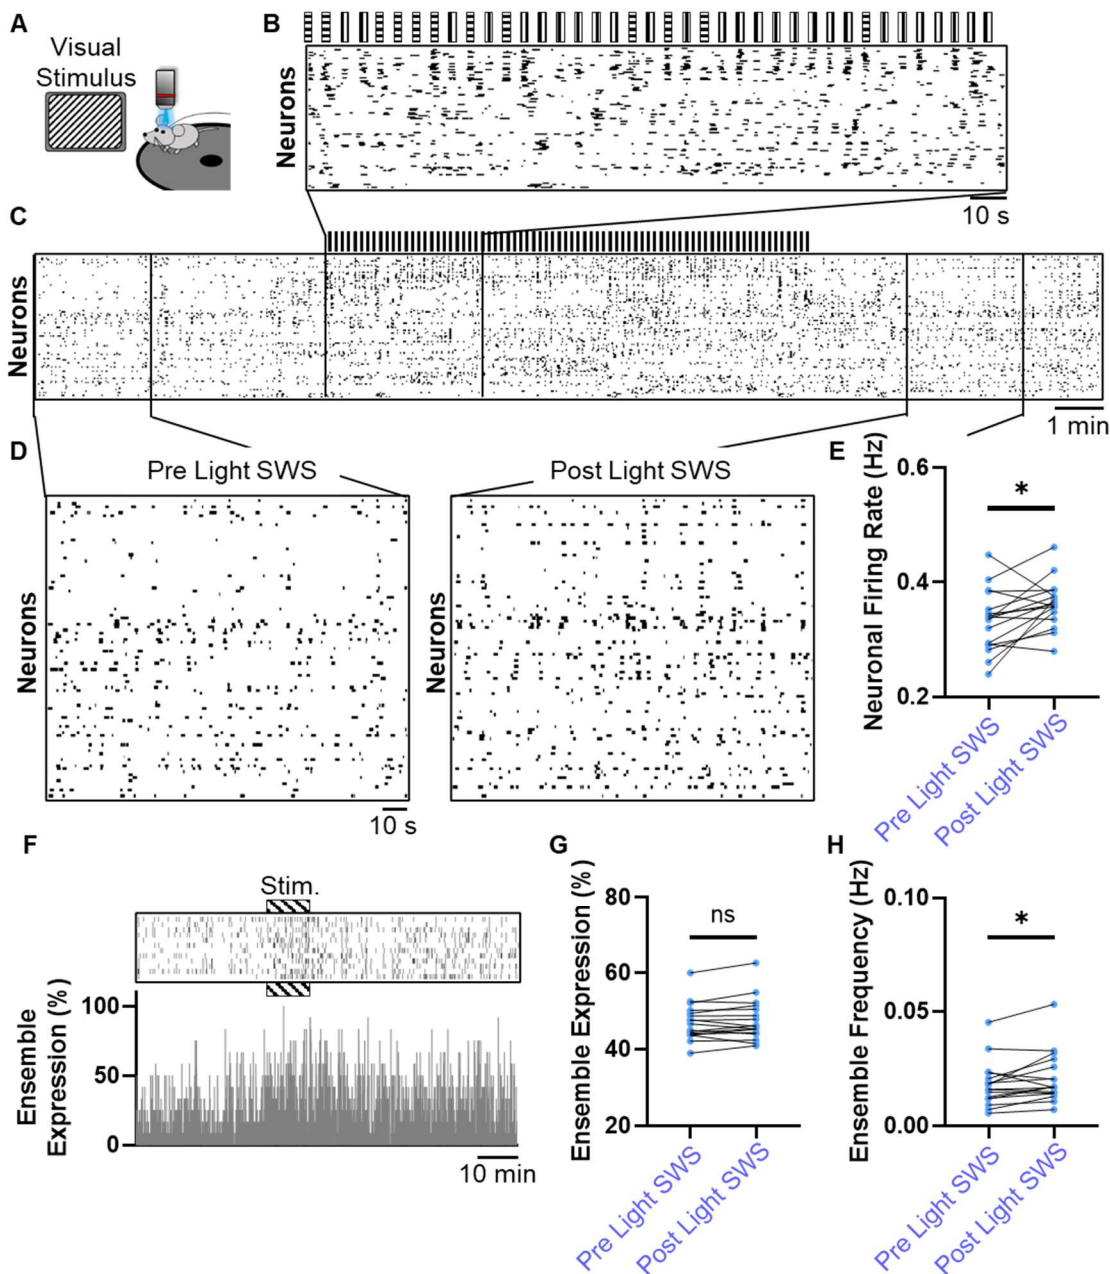

**Fig. 4. Neuronal ensembles reactivate following novel visual stimulation.**

**A**, Scheme to present novel visual stimulation. **B**, Sorted raster based on ensembles during visual presentation. **C**, Neuronal raster with rest periods before and after visual presentation. **D**, Neuronal raster during sleep in the pre rest phase (left) and neuronal raster during sleep in the post rest phase (right). **E**, Average neuronal firing rate during light SWS. **F**, Raster ensemble cells (top) and expression with visual stim. Note: higher activity in post rest phase. **G**, Ensemble expression. **H**, Ensemble frequency Paired t-test. ns  $\equiv$   $p > 0.05$ , \*  $\equiv$   $p < 0.05$



## 1 Discussion

2 In order to understand the function of neuronal ensembles across wake and sleep, we  
3 measured spontaneous and visually evoked neuronal network activity in V1 in different wake and  
4 sleep states. Upon the introduction of a visual presentation to evoke neuronal ensemble activity  
5 in V1, we found that ensembles extracted from the stimulus period had increased reactivation in  
6 subsequent light SWS, and this followed a general trend of increased neuronal activity in that  
7 sleep stage. When comparing the cortical functional architecture between wake and sleep states  
8 we found changes that distinctly separated wake from REM sleep from SWS stages. In addition,  
9 these functional architectures across wake and sleep states were conserved following visual  
10 evoked activity. Analyzing the synchronous firing of neurons to form neuronal ensembles using  
11 NMF, we found that neuronal ensembles present in SWS were similarly active to those found in  
12 wake states, yet the frequency of ensembles and their expression were reduced in REM sleep,  
13 further suggesting a dichotomy between network processing in these specific sleep stages.

14 The effect of sleep could be observed at the network level in the parameters of functional  
15 connectivity and average clustering coefficient. An increase in the nonzero functional connectivity  
16 of the pairwise connections during sleep states, compared to wake suggests network states of  
17 heightened similarity in firing patterns. Sleep states are widely understood to be synchronous  
18 states compared to desynchronized waking states<sup>8,25</sup>, as is characterized by sleep states being  
19 dominated by low frequency oscillations in the local field potential<sup>7,26</sup>. Interestingly, the increase  
20 in functional connectivity of nonzero pairwise connections also came with a decrease in the  
21 average clustering coefficient. This suggests offline processing as being selective for specific  
22 arrangements of neurons over the desynchronized activity in wake. Previous work has shown that  
23 sleep increased the firing of hippocampal neurons specially found within ensembles over  
24 nonensemble neurons<sup>24</sup>, which is in line with our findings.

25 The encoding of percepts on cortical neuronal networks is believed to occur by neuronal  
26 ensembles during the repeatable cofiring of neurons. Using NMF, we discovered that neuronal  
27 ensembles were active across all vigilance states and that specific sleep stages showed distinct  
28 ensemble activity. While SWS was similar to wake in ensemble frequency and expression, we  
29 found that ensembles present during REM sleep had reduced expression and frequency of  
30 occurrence comparatively. This reduction in neuronal ensemble quality during REM sleep is in  
31 line with previous accounts of REM being involved in synaptic downscaling<sup>14</sup>. Recent work has  
32 uncovered REM to be involved in emotionally-charged or arousing memory processing<sup>18</sup>.  
33 Perhaps incorporating arousing stimuli in our paradigm would alter the way ensembles are treated  
34 in REM sleep.

35 Passive viewing of visual stimuli had the effect of increasing the spontaneous reactivation  
36 of visually evoked neuronal ensembles. Neuronal ensembles classified during the stimulus block  
37 became spontaneously active across all behavioral states, but, interestingly, only those in light  
38 slow-wave sleep showed an increase in the frequency of neuronal ensemble occurrences. The  
39 increased frequency of stimulus-classified neuronal ensembles may have been spurred by an  
40 overall increase in neuronal firing rate, as this was also specifically increased during light slow-  
41 wave sleep. It may be that light slow-wave sleep places the brain in a quiescent state without  
42 major neuromodulatory control such as REM sleep and deep SWS driven largely by acetylcholine,  
43 serotonin and norepinephrine<sup>25</sup>.

44 Taken together, our results provide a hypothesis that explains the similarity between  
45 neuronal ensembles in spontaneous and visually evoked activity. Rather than the original  
46 hypothesis that cortical activity during sensory stimulation generated ensembles, our data suggest  
47 that visual stimulation itself, by repeated applications, reconfigures cortical circuits and reactivates  
48 endogenous ensembles. These ensembles are then reactivated spontaneously during different

- 1 wake and sleep states. Overall, our data indicate that cortical circuits are eminently plastic and
- 2 can react to repeated sensory stimuli by reconfiguring its correlational architecture during slow-
- 3 wave sleep.
- 4

## 1 **Materials and Methods**

### 2 **Proper animal use and care**

3 All the procedures for handling and sacrificing animals were approved by the Columbia  
4 University Institutional Animal Care and Use Committee (IACUC) in compliance with the National  
5 Institutes of Health guidelines for the care and use of laboratory animals. We used both female  
6 and male transgenic animals (VGluT1-GCaMP6s) that were 2-6 months of age, kept on a  
7 continuous 12h light/dark cycle and freely available to food and water.

### 8 **Stereotaxic surgery for cranial window, ECoG and EMG**

9 Mice were anesthetized with 1.5-2% isoflurane and placed in a stereotaxic atop a heating  
10 pad maintained at 37° C, and faux tears were applied to prevent corneal dehydration. Carprofen  
11 (5 mg/kg), Dexamethasone (0.6 mg/kg), and Enrofloxacin (5 mg/kg) was administered  
12 intraperitoneally. Hair was removed from the scalp and ethanol and chlorhexidine was applied.  
13 Lidocaine was administered locally to the scalp before an incision was made down the midline of  
14 the scalp to expose the skull. A screw was placed over the right frontal plate. Next, a hole was  
15 drilled over the primary visual cortex <sup>27</sup> (V1; in mm from bregma: -3.4<sub>a-p</sub>, 2.1<sub>m-l</sub>) and a tungsten  
16 electrode was placed to record electrocorticogram (ECoG). Wires were placed in the nuchal  
17 muscle to record electromyography (EMG), and a titanium headplate was cemented onto the  
18 exposed skull using dental cement. A 3 mm craniotomy was made over the contralateral primary  
19 visual cortex (in mm from bregma: -3.4<sub>a-p</sub>, -2.1<sub>m-l</sub>), and the dura was removed. Finally, a 3 mm  
20 glass coverslip was placed on the exposed cortex and fixed using super glue.

### 21 **In vivo two-photon calcium fluorescence imaging**

22 In vivo imaging was performed in layers 2/3 (100 – 300 μm below the cortical surface) of  
23 the exposed mouse cortex with a custom two-photon system comprised of Ti:sapphire lasers  
24 (MaiTai DeepSee at 920 nm) for imaging a 31 Hz resonance galvanometer two-photon  
25 microscope to capture 512x512 digital images (500 μm<sup>3</sup>). Videos were obtained for 1-2 hours.

### 26 **Electrophysiological recordings**

27 Electrocorticogram (ECoG) was recorded using an A-M Systems Model 3000 at a  
28 bandpass filter of 1 Hz – 1 kHz. Electromyography (EMG) was recorded using a Warner  
29 Instruments DP-301 with a bandpass filter of 1-100 Hz. Both signals were sampled at 5 kHz and  
30 recorded with a PC running MScan.

### 31 **Sleep automatic rating**

32 Sleep rating was done automatically. The ECoG frequency content and EMG activity was  
33 monitored to determine brain state based on number of standard deviations (SD) over the mean:  
34 below 1 SD EMG and over ½ or 1 SD delta activity (1-4 Hz) denote light and deep SWS  
35 respectively, below ½ SD EMG with over ½ SD theta (6-10 Hz) divided by delta activity denotes  
36 REM sleep. and all other as locomotion or quiet wake <sup>28</sup>. Only epochs that lasted at least 15  
37 seconds were accepted.

### 38 **Visual stimulation**

39 Drifting Gabor patches were presented to the visual field of the mouse on a monitor  
40 connected to a PC running the Psychtoolbox <sup>29</sup> ([psychtoolbox.org](http://psychtoolbox.org)). Gabor patches were  
41 presented in pseudorandom orientation 2 s with 3 s interstimulus of black screen and repeated  
42 120 times over a 10-minute span.

### 43 **Calcium image processing and analysis**

1 All images were frame averaged by 3 to create videos at 10.3 Hz and registration was  
2 performed using TurboReg in ImageJ. Next, regions of interest (ROIs) were created automatically  
3 from thresholding correlation images and ROI maps underwent manually correction using custom  
4 MATLAB scripts. Fluorescent traces and event detection from ROIs were quantified as in <sup>30</sup>.  
5 Functional connectivity between a neuron pair was analyzed by taking the cosine similarity of  
6 vectors of rasterized activity. For individual states of vigilance, only frames that included that  
7 specific state was used for cosine similarity. Clustering coefficients were quantified by taking all  
8 nonzero similarity matrices as adjacency matrices as input into the additional MATLAB function  
9 `clustCoeff()` <sup>31</sup>. Neuronal ensembles were detected using Non-negative Matrix Factorization  
10 (NMF) <sup>23,24</sup> [REF], where a raster of neuronal activity over the entire experiment for spontaneous  
11 activity or a raster during the stimulation block was input into the MATLAB function `nnmf()` to  
12 detect K ensembles determined from the 95<sup>th</sup> percentile of a latent determined from performing  
13 PCA on a shuffled raster.  
14

## 1 Acknowledgements

2 We would like to thank and Lux Steinberg for technical support and help with writing; Alejandro  
3 Akrouh, Maria Tzitzitlini Alejandre García, Hakim Belmouaddine, Victor Cornejo, Alison Hanson,  
4 Rasmussen Herlo, James Holland, Doug Miller, Netanel Ofer, Darik O'Neill, Jesus Perez, Samuel  
5 Pontes-Queros, Yuriy Shymkiv, and Wataru Yamamoto for helpful suggestions; This work was  
6 supported by NIH-NIA (F32A354069) to J.L.; NEI (R01EY011787), NIMH (R01MH115900) to R.Y.

## 7 Author Contributions

8 J.L. and R.Y. contributed to project conception, project design, and manuscript writing. J.L.  
9 performed the experiments and analyzed the results. R.Y. directed the project and secured  
10 resources and funding.

## 11 Competing Interests statement

12 The authors declare no competing interests.

13

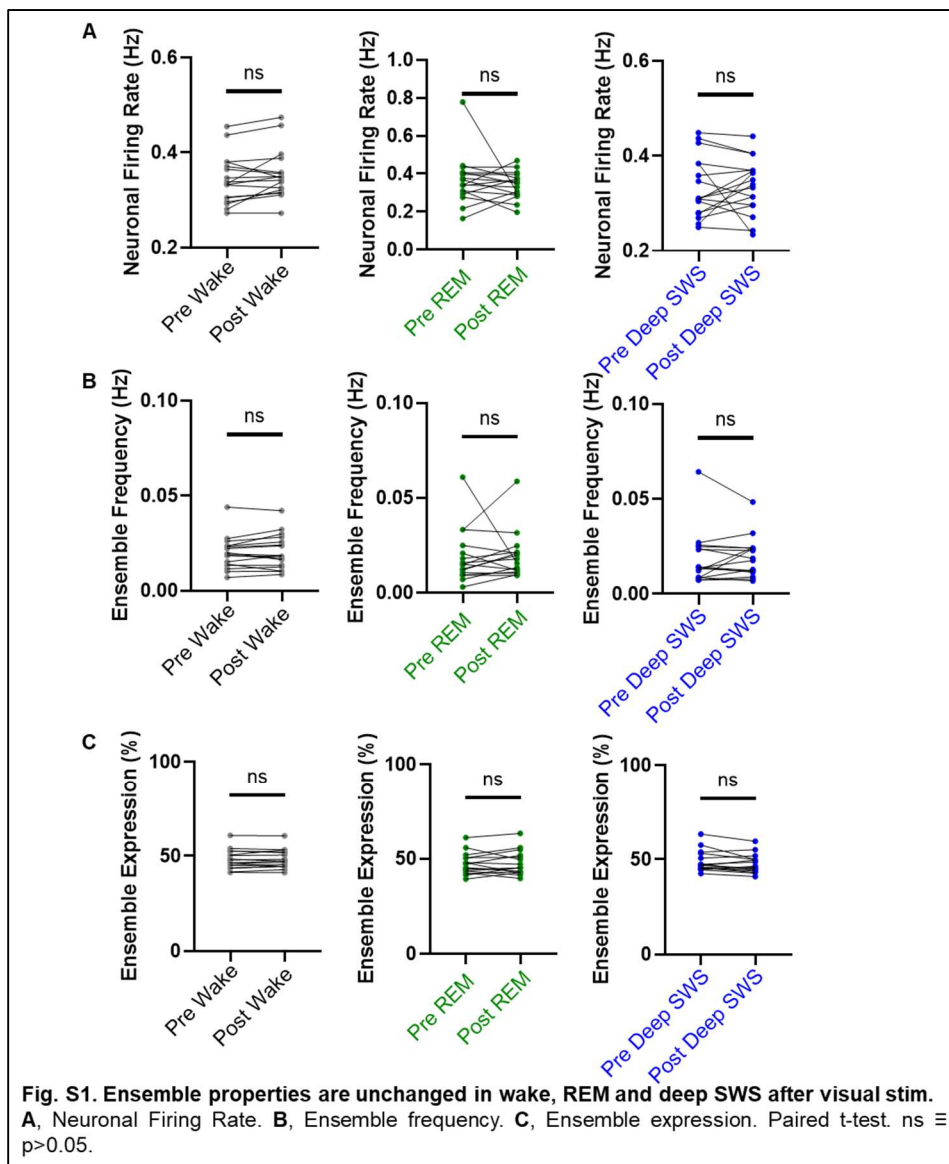

## 1 **References**

- 2 1. Yuste, R. From the neuron doctrine to neural networks. *Nat. Rev. Neurosci.* **16**, 487–497  
3 (2015).
- 4 2. Carrillo-Reid, L. & Yuste, R. Playing the piano with the cortex: role of neuronal  
5 ensembles and pattern completion in perception and behavior. *Curr. Opin. Neurobiol.* **64**, 89–95  
6 (2020).
- 7 3. Cossart, R., Aronov, D. & Yuste, R. Attractor dynamics of network UP states in the  
8 neocortex. *Nature* **423**, 283–288 (2003).
- 9 4. Carrillo-Reid, L., Miller, J. K., Hamm, J. P., Jackson, J. & Yuste, R. Endogenous  
10 Sequential Cortical Activity Evoked by Visual Stimuli. *J. Neurosci.* **35**, 8813–8828 (2015).
- 11 5. Miller, J. K., Ayzenshtat, I., Carrillo-Reid, L. & Yuste, R. Visual stimuli recruit intrinsically  
12 generated cortical ensembles. *Proc. Natl. Acad. Sci.* **111**, E4053–E4061 (2014).
- 13 6. Imprinting and recalling cortical ensembles | Science.  
14 [https://www.science.org/doi/full/10.1126/science.aaf7560?casa\\_token=Rwp7pGOwoyEAAAAA](https://www.science.org/doi/full/10.1126/science.aaf7560?casa_token=Rwp7pGOwoyEAAAAA%3Aeqmm8BL55fNFPfc_tun1DFq9KSogqtyYO8A7asKSPSiPsJ1vsmUJXZmiiHrVf9YNYARlh_A4G9UYDA)  
15 [%3Aeqmm8BL55fNFPfc\\_tun1DFq9KSogqtyYO8A7asKSPSiPsJ1vsmUJXZmiiHrVf9YNYARlh\\_](https://www.science.org/doi/full/10.1126/science.aaf7560?casa_token=Rwp7pGOwoyEAAAAA%3Aeqmm8BL55fNFPfc_tun1DFq9KSogqtyYO8A7asKSPSiPsJ1vsmUJXZmiiHrVf9YNYARlh_A4G9UYDA)  
16 [A4G9UYDA](https://www.science.org/doi/full/10.1126/science.aaf7560?casa_token=Rwp7pGOwoyEAAAAA%3Aeqmm8BL55fNFPfc_tun1DFq9KSogqtyYO8A7asKSPSiPsJ1vsmUJXZmiiHrVf9YNYARlh_A4G9UYDA).
- 17 7. Buzsáki, G. & Draguhn, A. Neuronal Oscillations in Cortical Networks. *Science* **304**,  
18 1926–1929 (2004).
- 19 8. Steriade, M. Grouping of brain rhythms in corticothalamic systems. *Neuroscience* **137**,  
20 1087–1106 (2006).
- 21 9. Wilson, M. A. & McNaughton, B. L. Reactivation of Hippocampal Ensemble Memories  
22 During Sleep. *Science* **265**, 676–679 (1994).
- 23 10. Ji, D. & Wilson, M. A. Coordinated memory replay in the visual cortex and hippocampus  
24 during sleep. *Nat. Neurosci.* **10**, 100–107 (2007).
- 25 11. Niethard, N., Brodt, S. & Born, J. Cell-Type-Specific Dynamics of Calcium Activity in  
26 Cortical Circuits over the Course of Slow-Wave Sleep and Rapid Eye Movement Sleep. *J.*  
27 *Neurosci.* **41**, 4212–4222 (2021).
- 28 12. Niethard, N. *et al.* Sleep-Stage-Specific Regulation of Cortical Excitation and Inhibition.  
29 *Curr. Biol.* **26**, 2739–2749 (2016).
- 30 13. Dong, Y., Li, J., Zhou, M., Du, Y. & Liu, D. Cortical regulation of two-stage rapid eye  
31 movement sleep. *Nat. Neurosci.* **25**, 1675–1682 (2022).
- 32 14. Zhou, Y. *et al.* REM sleep promotes experience-dependent dendritic spine elimination in  
33 the mouse cortex. *Nat. Commun.* **11**, 4819 (2020).
- 34 15. Yang, G. *et al.* Sleep promotes branch-specific formation of dendritic spines after  
35 learning. *Science* **344**, 1173–1178 (2014).
- 36 16. Miyazaki, T. *et al.* Dynamics of Cortical Local Connectivity during Sleep–Wake States  
37 and the Homeostatic Process. *Cereb. Cortex* **30**, 3977–3990 (2020).

- 1 17. Brier, L. M. *et al.* Separability of calcium slow waves and functional connectivity during  
2 wake, sleep, and anesthesia. *Neurophotonics* **6**, 035002 (2019).
- 3 18. Kim, S. Y. *et al.* Interactive effects of stress reactivity and rapid eye movement sleep  
4 theta activity on emotional memory formation. *Hippocampus* **30**, 829–841 (2020).
- 5 19. Oudiette, D., Antony, J. W., Creery, J. D. & Paller, K. A. The Role of Memory  
6 Reactivation during Wakefulness and Sleep in Determining Which Memories Endure. *J.*  
7 *Neurosci.* **33**, 6672–6678 (2013).
- 8 20. van de Ven, G. M., Trouche, S., McNamara, C. G., Allen, K. & Dupret, D. Hippocampal  
9 Offline Reactivation Consolidates Recently Formed Cell Assembly Patterns during Sharp Wave-  
10 Ripples. *Neuron* **92**, 968–974 (2016).
- 11 21. Nadel, L., Hubbach, A., Gomez, R. & Newman-Smith, K. Memory formation,  
12 consolidation and transformation. *Neurosci. Biobehav. Rev.* **36**, 1640–1645 (2012).
- 13 22. Lines, J., Nation, K. & Fellous, J.-M. Dorsoventral and Proximodistal Hippocampal  
14 Processing Account for the Influences of Sleep and Context on Memory (Re)consolidation: A  
15 Connectionist Model. *Comput. Intell. Neurosci.* **2017**, e8091780 (2017).
- 16 23. Lee, D. D. & Seung, H. S. Learning the parts of objects by non-negative matrix  
17 factorization. *Nature* **401**, 788–791 (1999).
- 18 24. Ghandour, K. *et al.* Orchestrated ensemble activities constitute a hippocampal memory  
19 engram. *Nat. Commun.* **10**, 2637 (2019).
- 20 25. Lee, S.-H. & Dan, Y. Neuromodulation of Brain States. *Neuron* **76**, 209–222 (2012).
- 21 26. Buzsáki, G., Anastassiou, C. A. & Koch, C. The origin of extracellular fields and currents  
22 — EEG, ECoG, LFP and spikes. *Nat. Rev. Neurosci.* **13**, 407–420 (2012).
- 23 27. Konsman, J.-P. The mouse brain in stereotaxic coordinates - Second Edition (Deluxe)  
24 By Paxinos G. and Franklin, K.B.J., Academic Press, New York, 2001, ISBN 0-12-547637-X.  
25 *Psychoneuroendocrinology* **6**, 827–828 (2003).
- 26 28. Vaidyanathan, T. V., Collard, M., Yokoyama, S., Reitman, M. E. & Poskanzer, K. E.  
27 Cortical astrocytes independently regulate sleep depth and duration via separate GPCR  
28 pathways. *eLife* **10**, e63329 (2021).
- 29 29. Kleiner, M. What's new in Psychtoolbox-3?
- 30 30. Hamm, J. P., Peterka, D. S., Gogos, J. A. & Yuste, R. Altered Cortical Ensembles in  
31 Mouse Models of Schizophrenia. *Neuron* **94**, 153-167.e8 (2017).
- 32 31. Newman, M. E. J. The Structure and Function of Complex Networks. *SIAM Rev.* **45**,  
33 167–256 (2003).

34

1 **Figure Legends**

2 **Figure 1. Imaging neuronal activity during sleep in a head-restrained mouse.**

3 **A**, Head-restrained imaging and electrophysiology. **B**, Infrared imaging of mouse across wake  
4 and sleep states with ECoG traces, frequency spectrograms, EMG traces. **C**, GCaMP6s  
5 expression in layer 2/3 of the primary visual cortex. **D**, Neuronal Ca<sup>2+</sup> traces from C across wake  
6 and sleep states.

7 **Fig. 2. Neuronal functional architecture across wake and sleep.**

8 **A**, Matrices denoting functional connectivity between pairs of neurons measured by cosine  
9 similarity of rasterized traces across wake and sleep states. **B**, Functional connectivity not  
10 including pairs that were equal to zero. **C**, Graphs from binarized functional connectivity matrices  
11 in A. Dotted lines are connections with functional connectivity above 0.35 and solid lines are above  
12 0.5. **D**, Average clustering coefficient. Paired t-test after ANOVA. \*  $\equiv$   $p < 0.05$ , \*\*  $\equiv$   $p < 0.01$ , \*\*\*  $\equiv$   
13  $p < 0.001$

14 **Fig. 3. Neuronal ensembles are differentially active across brain states.**

15 **A**, GCaMP6s positive neurons. **B**, NMF extracted ensembles overlaid on ROIs. **C**, Traces from  
16 the first four ensembles from like colored cells in B. **D**, Sorted raster of neuronal activity. **E**, Raster  
17 of cells within ensemble 4 in C across wake and sleep (top), and its expression of proportion of  
18 cells active (bottom) with 35% ensemble threshold. **F**, Ensemble frequency. **G**, Ensemble  
19 expression. Paired t-test after ANOVA. ns  $\equiv$   $p > 0.05$ , \*  $\equiv$   $p < 0.05$ , \*\*  $\equiv$   $p < 0.01$

20 **Fig. 4. Neuronal ensembles reactivate following novel visual stimulation.**

21 **A**, Scheme to present novel visual stimulation. **B**, Sorted raster based on ensembles during visual  
22 presentation. **C**, Neuronal raster with rest periods before and after visual presentation. **D**,  
23 Neuronal raster during sleep in the pre rest phase (left) and neuronal raster during sleep in the  
24 post rest phase (right). **E**, Average neuronal firing rate during light SWS. **F**, Raster ensemble cells  
25 (top) and expression with visual stim. Note: higher activity in post rest phase. **G**, Ensemble  
26 expression. **H**, Ensemble frequency Paired t-test. ns  $\equiv$   $p > 0.05$ , \*  $\equiv$   $p < 0.05$

27 **Fig. S1. Ensemble properties are unchanged in wake, REM and deep SWS after visual stim.**

28 **A**, Neuronal Firing Rate. **B**, Ensemble frequency. **C**, Ensemble expression. Paired t-test. ns  $\equiv$   
29  $p > 0.05$ .

30
